# Supplementary material for: The Association between Oral Health-Related Quality of Life, Loneliness, Perceived and Objective Social Isolation—Results of a Nationally Representative Survey
Source: MDPI journal article supplement (doi:10.3390/ijerph182412886), 2021-12-07
Supplement: s1 [file s1]

**Supplementary Table S1.** Determinants of loneliness, perceived social isolation and objective social isolation (with dichotomized oral health-related quality of life). Results of multiple linear regressions.

| Independent variables                                                                 | Loneliness        | Perceived social isolation | Objective social isolation |
|---------------------------------------------------------------------------------------|-------------------|----------------------------|----------------------------|
| Oral health-related quality of life (dichotomized: Reference category: score of zero) | 0.20***<br>(0.02) | 0.28***<br>(0.03)          | 0.46*<br>(0.21)            |
| Potential confounders                                                                 | ✓                 | ✓                          | ✓                          |
| Observations                                                                          | 3,075             | 3,075                      | 3,075                      |
| Adjusted R <sup>2</sup>                                                               | 0.16              | 0.21                       | 0.16                       |
| R <sup>2</sup>                                                                        | 0.17              | 0.22                       | 0.17                       |
| F-value (p-value)                                                                     | 21.79 (p<.001)    | 33.08 (p<.001)             | 22.21 (p<.001)             |

Notes: Unstandardized beta-coefficients are displayed; Robust standard errors in parentheses; \*\*\* p<0.001, \*\* p<0.01, \* p<0.05, + p<0.10; Potential confounders include sex, age, marital status, education, presence of children in the same household, smoking status, alcohol intake, sports activities, vaccinated against Covid-19, presence of chronic diseases and self-rated health.

**Supplementary Table S2.** Determinants of loneliness, perceived social isolation and objective social isolation (with interaction terms: denture usage x oral health-related quality of life). Results of multiple linear regressions.

| Independent variables                                                                  | Loneliness        | Perceived social isolation | Objective social isolation |
|----------------------------------------------------------------------------------------|-------------------|----------------------------|----------------------------|
| Oral health-related quality of life                                                    | 0.04***<br>(0.00) | 0.06***<br>(0.01)          | 0.07+<br>(0.04)            |
| Denture usage (Ref.: without dentures):                                                |                   |                            |                            |
| - With removable dentures                                                              | 0.01<br>(0.05)    | 0.02<br>(0.05)             | -0.21<br>(0.44)            |
| - With complete dentures                                                               | 0.01<br>(0.08)    | 0.04<br>(0.05)             | -0.28<br>(0.79)            |
| Interaction terms (Denture usage x oral health-related quality of life):               |                   |                            |                            |
| With removable dentures (Ref.: without dentures) x oral health-related quality of life | -0.02*<br>(0.01)  | -0.01<br>(0.51)            | -0.01<br>(0.08)            |
| With complete dentures (Ref.: without dentures) x oral health-related quality of life  | 0.00<br>(0.02)    | 0.01<br>(0.58)             | 0.05<br>(0.14)             |
| Potential confounders                                                                  | ✓                 | ✓                          | ✓                          |
| Observations                                                                           | 3,075             | 3,075                      | 3,075                      |
| Adjusted R <sup>2</sup>                                                                | 0.17              | 0.24                       | 0.17                       |
| R <sup>2</sup>                                                                         | 0.18              | 0.23                       | 0.16                       |
| F-value (p-value)                                                                      | 20.49 (p<.001)    | 32.87 (p<.001)             | 19.71 (p<.001)             |

Notes: Unstandardized beta-coefficients are displayed; Robust standard errors in parentheses; \*\*\* p<0.001, \*\* p<0.01, \* p<0.05, + p<0.10; Potential confounders include sex, age, marital status, education, presence of children in the same household, smoking status, alcohol intake, sports activities, vaccinated against Covid-19, presence of chronic diseases and self-rated health.
